# Supplementary material
Source: PubMed Central journal article supplement (PMC8162829)
Supplement: NIHMS1700852-supplement-1.pdf [file NIHMS1700852-supplement-1.pdf]

Supplemental Table 1

|                         | Age (w) | WT            | cKO           | p-value |
|-------------------------|---------|---------------|---------------|---------|
| <b>Ct.Th</b>            | 8       | 0.198 ± 0.016 | 0.198 ± 0.020 | 0.958   |
| <b>(mm)</b>             | 18      | 0.256 ± 0.027 | 0.262 ± 0.021 | 0.475   |
| <b>Ct.TA</b>            | 8       | 2.00 ± 0.20   | 1.88 ± 0.24   | 0.261   |
| <b>(mm<sup>2</sup>)</b> | 18      | 2.21 ± 0.24   | 2.20 ± 0.26   | 0.908   |
| <b>Ct.BA</b>            | 8       | 0.892 ± 0.090 | 0.863 ± 0.114 | 0.526   |
| <b>(mm<sup>2</sup>)</b> | 18      | 1.14 ± 0.12   | 1.19 ± 0.14   | 0.288   |
| <b>Ct.MA</b>            | 8       | 1.11 ± 0.14   | 1.02 ± 0.16   | 0.227   |
| <b>(mm<sup>2</sup>)</b> | 18      | 1.07 ± 0.17   | 1.01 ± 0.17   | 0.328   |
| <b>BV/TV</b>            | 8       | 0.140 ± 0.047 | 0.118 ± 0.036 | 0.253   |
|                         | 18      | 0.116 ± 0.041 | 0.126 ± 0.041 | 0.509   |
| <b>vBMD</b>             | 8       | 227 ± 42      | 211 ± 34      | 0.342   |
| <b>(mg/ccm)</b>         | 18      | 207 ± 37.9    | 218 ± 38      | 0.412   |
| <b>Tb.N</b>             | 8       | 4.76 ± 0.94   | 4.84 ± 0.57   | 0.805   |
| <b>(number/mm)</b>      | 18      | 3.74 ± 0.71   | 3.72 ± 0.59   | 0.927   |
| <b>Tb.Th</b>            | 8       | 0.046 ± 0.005 | 0.044 ± 0.005 | 0.297   |
| <b>(mm)</b>             | 18      | 0.051 ± 0.008 | 0.054 ± 0.006 | 0.295   |
| <b>Tb.Sp</b>            | 8       | 0.221 ± 0.057 | 0.214 ± 0.028 | 0.743   |
| <b>(mm)</b>             | 18      | 0.280 ± 0.066 | 0.277 ± 0.049 | 0.871   |

Supplemental Table 1. MicroCT parameters for male mice, showing mean ± SD. Group sizes: WT n=10 at 8 weeks and n=15 at 18 weeks; cKO n=11 at 8 weeks and n=17 at 18 weeks. Unpaired, two-tailed t-tests.

Supplemental Table 2

|                                         | Age (w) | WT            | cKO           | p-value        |
|-----------------------------------------|---------|---------------|---------------|----------------|
| <b>Ct.Th</b><br><b>(mm)</b>             | 8       | 0.167 ± 0.009 | 0.181 ± 0.019 | <b>0.035*</b>  |
|                                         | 18      | 0.229 ± 0.012 | 0.234 ± 0.014 | <b>0.005**</b> |
|                                         | 30      | 0.239 ± 0.013 | 0.252 ± 0.012 | <b>0.012*</b>  |
| <b>Ct.TA</b><br><b>(mm<sup>2</sup>)</b> | 8       | 1.80 ± 0.16   | 1.74 ± 0.21   | 0.420          |
|                                         | 18      | 1.71 ± 0.21   | 1.66 ± 0.10   | 0.416          |
|                                         | 30      | 1.95 ± 0.16   | 1.91 ± 0.14   | 0.566          |
| <b>Ct.BA</b><br><b>(mm<sup>2</sup>)</b> | 8       | 0.730 ± 0.063 | 0.762 ± 0.113 | 0.404          |
|                                         | 18      | 0.875 ± 0.066 | 0.909 ± 0.064 | 0.182          |
|                                         | 30      | 1.02 ± 0.06   | 1.05 ± 0.06   | 0.180          |
| <b>Ct.MA</b><br><b>(mm<sup>2</sup>)</b> | 8       | 1.07 ± 0.11   | 0.976 ± 0.122 | 0.056          |
|                                         | 18      | 0.840 ± 0.156 | 0.754 ± 0.068 | 0.070          |
|                                         | 30      | 0.931 ± 0.123 | 0.859 ± 0.093 | 0.133          |
| <b>BV/TV</b>                            | 8       | 0.067 ± 0.024 | 0.082 ± 0.034 | 0.241          |
|                                         | 18      | 0.068 ± 0.019 | 0.065 ± 0.015 | 0.620          |
|                                         | 30      | 0.039 ± 0.010 | 0.035 ± 0.020 | 0.587          |
| <b>vBMD</b><br><b>(mg/ccm)</b>          | 8       | 163 ± 24      | 176 ± 39      | 0.359          |
|                                         | 18      | 167 ± 19      | 164 ± 18      | 0.683          |
|                                         | 30      | 136 ± 12      | 131 ± 22      | 0.503          |
| <b>Tb. N.</b><br><b>(number/mm)</b>     | 8       | 3.75 ± 0.54   | 4.04 ± 0.75   | 0.291          |
|                                         | 18      | 2.99 ± 0.48   | 2.73 ± 0.13   | 0.174          |
|                                         | 30      | 2.42 ± 0.35   | 2.16 ± 0.09   | 0.082          |
| <b>Tb. Th.</b><br><b>(mm)</b>           | 8       | 0.041 ± 0.003 | 0.043 ± 0.009 | 0.529          |
|                                         | 18      | 0.044 ± 0.003 | 0.047 ± 0.003 | 0.044*         |
|                                         | 30      | 0.047 ± 0.007 | 0.046 ± 0.004 | 0.543          |
| <b>Tb. Sp.</b><br><b>(mm)</b>           | 8       | 0.275 ± 0.042 | 0.260 ± 0.057 | 0.447          |
|                                         | 18      | 0.359 ± 0.068 | 0.382 ± 0.060 | 0.227          |
|                                         | 30      | 0.426 ± 0.064 | 0.480 ± 0.028 | 0.091          |

Supplemental Table 2. MicroCT parameters for female mice, showing mean ± SD. Group sizes: WT n=12 at 8 weeks, n=15 at 18 weeks, n=10 at 30 weeks; cKO n=12 at 8 and 18 weeks, n=16 at 30 weeks. Unpaired, two-tailed t-tests.

## Supplemental Figure 1 -

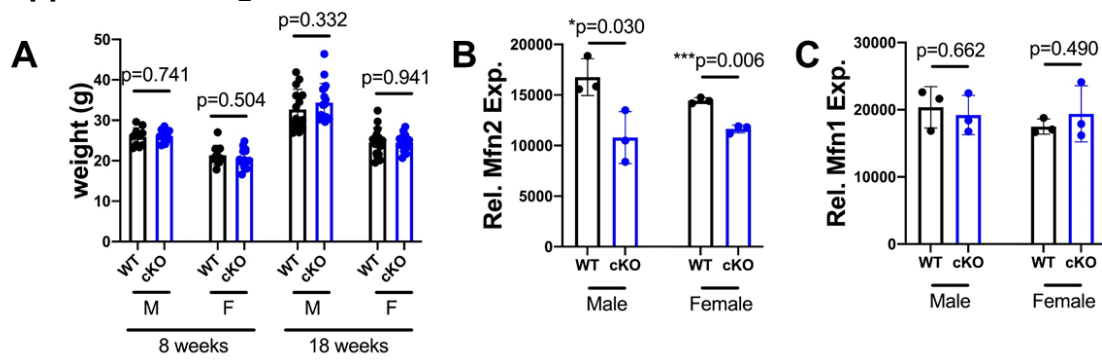

Supplemental Figure 1. A) No difference in weight in Mfn2 cKO mice at 8 or 18 weeks. B) Mfn2 mRNA is depleted in crushed cortical bone of both male and female cKO. C) Mfn1 mRNA is unchanged. Unpaired t-tests with Welch's correction.

Supplemental Figure 2

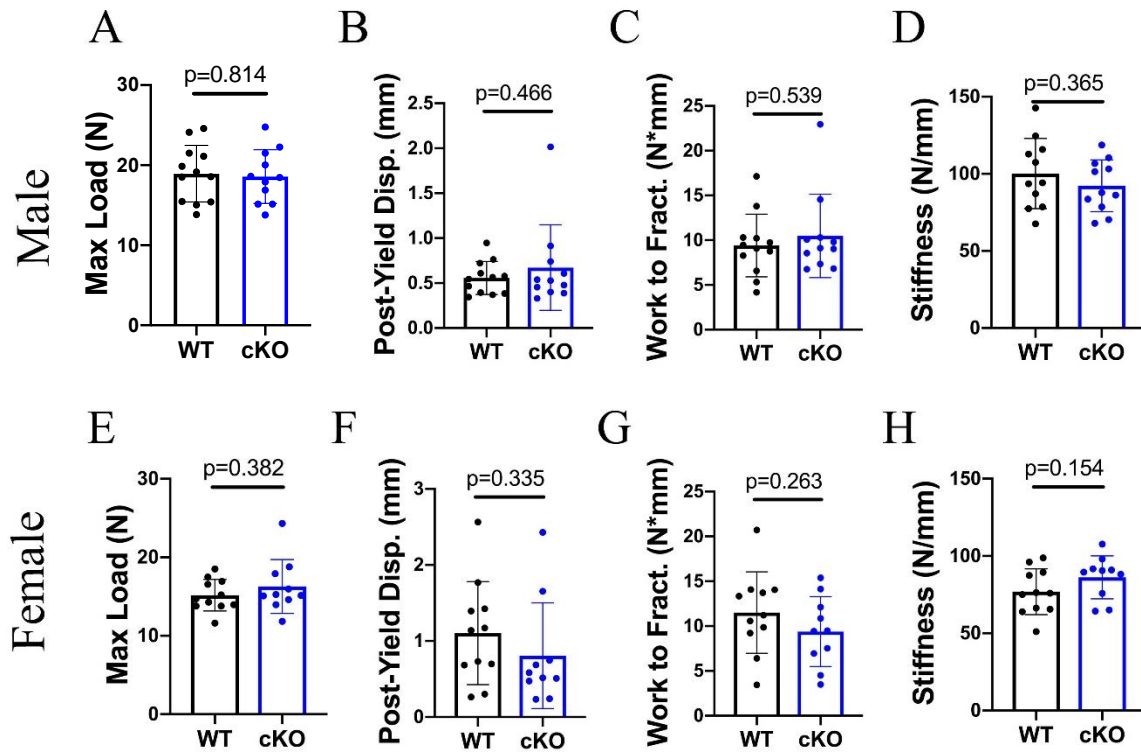

Supplemental Figure 2. No change in bone strength of femurs by mechanical testing at 8 weeks of age in either males (A-D) or females (E-H).

### Supplemental Figure 3

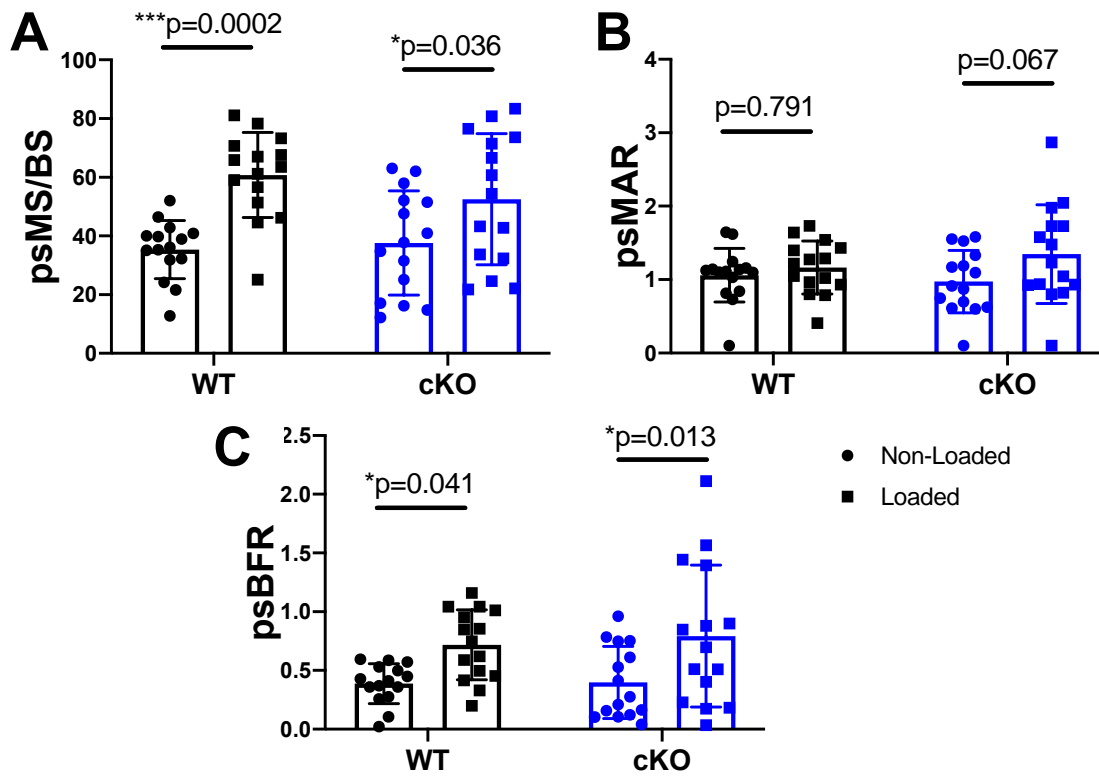

Supplemental Figure 3. Similar response to mechanical loading of the tibia in 18 week female mice. Dynamic histomorphometry was performed at peak strain site. 2-way ANOVA showed the indicated responses to 5 days of loading in each genotype, but no differences by genotype or interaction between loading and genotype.

## Supplemental Figure 4

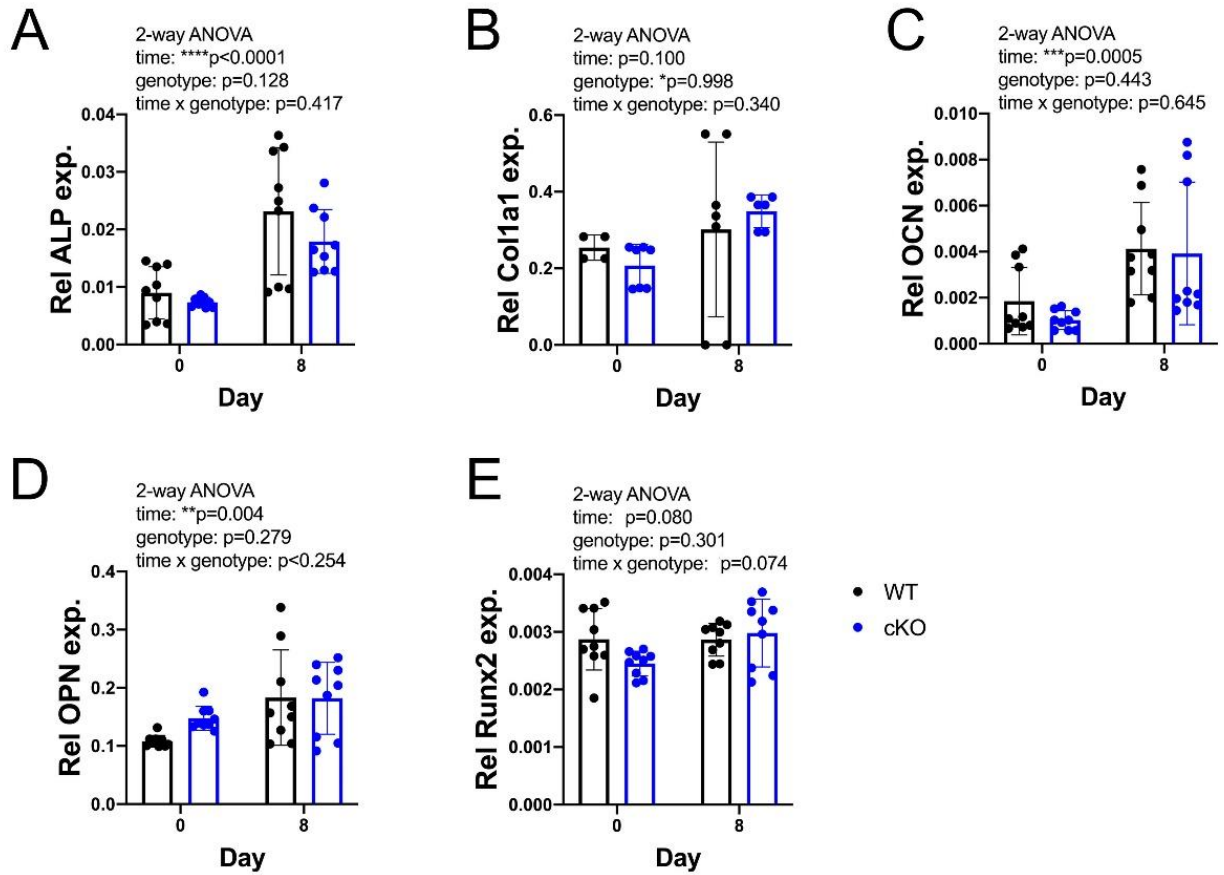

Supplemental Figure 4. Markers of osteogenesis in MSCs induced with high dose (10 mM)  $\beta$ -GP are similar in WT and cKO cultures. Data points represent biological replicates. 2-way ANOVA.

Supplemental Figure 5

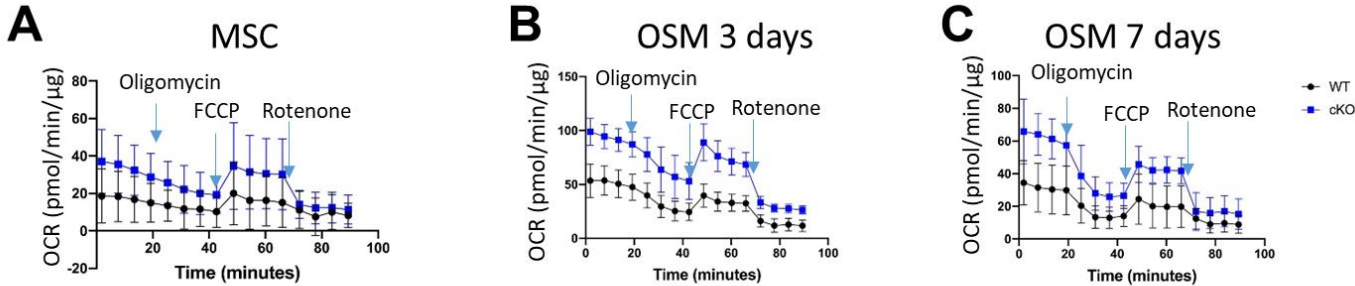

Supplemental Figure 5. Tracings used for oxygen consumption rates in undifferentiated MSCs (A) or those differentiated in OSM for 3 days (B) or 7 days (C). Timing of addition of oligomycin, FCCP, and rotenone are indicated with arrows.
